# Supplementary figures and images for: Controlled implant/soft tissue interaction by nanoscale surface modifications of 3D porous titanium implants
Source: Royal Society of Chemistry journal article supplement (doi:10.1039/c5nr01237f), 2015-01-01

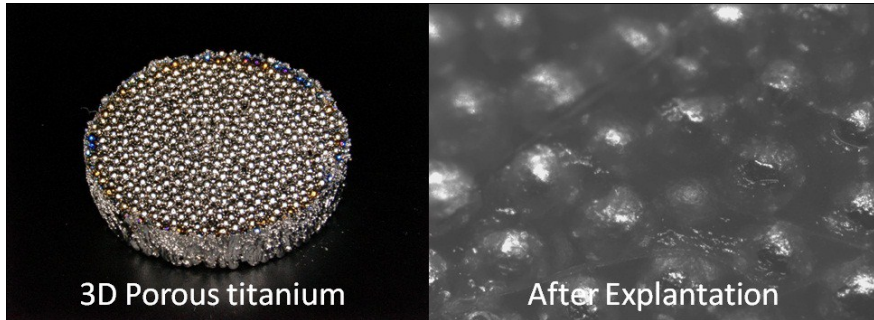

Supplement: c5nr01237f2.pdf [file c5nr01237f2.pdf]

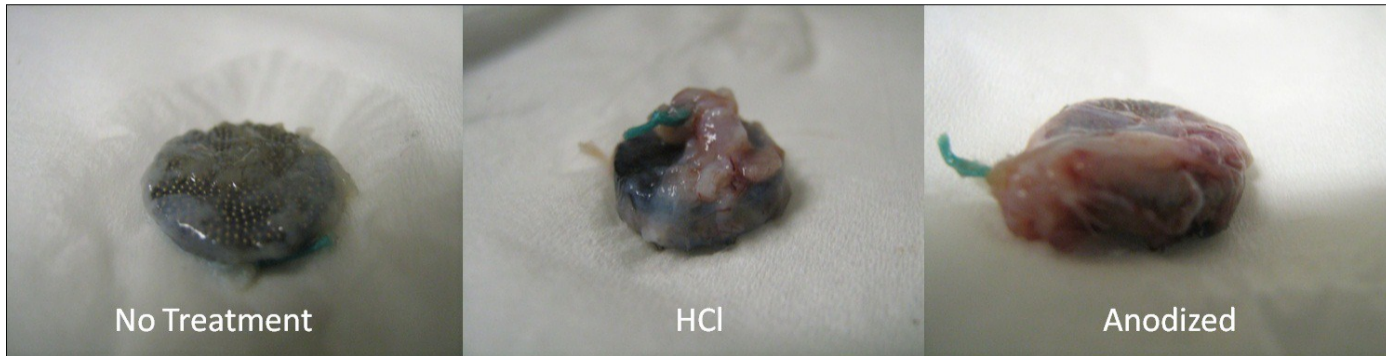

Supplement: c5nr01237f3.pdf [file c5nr01237f3.pdf]

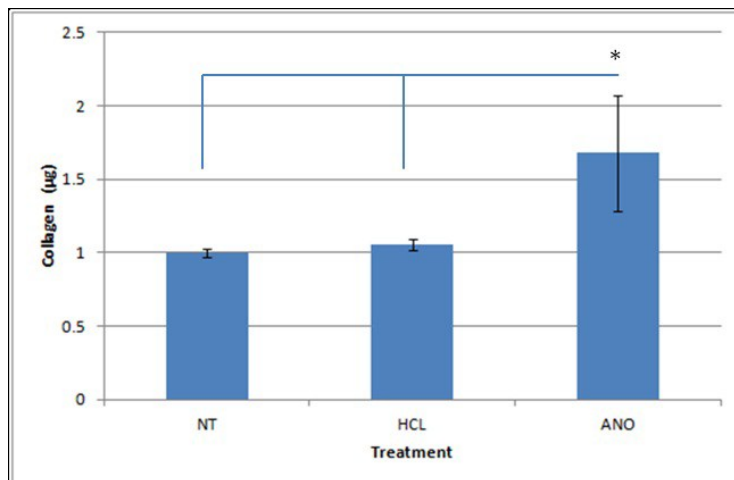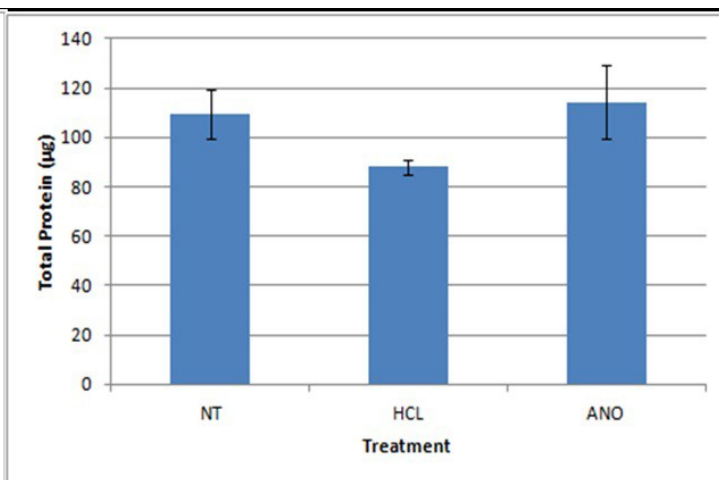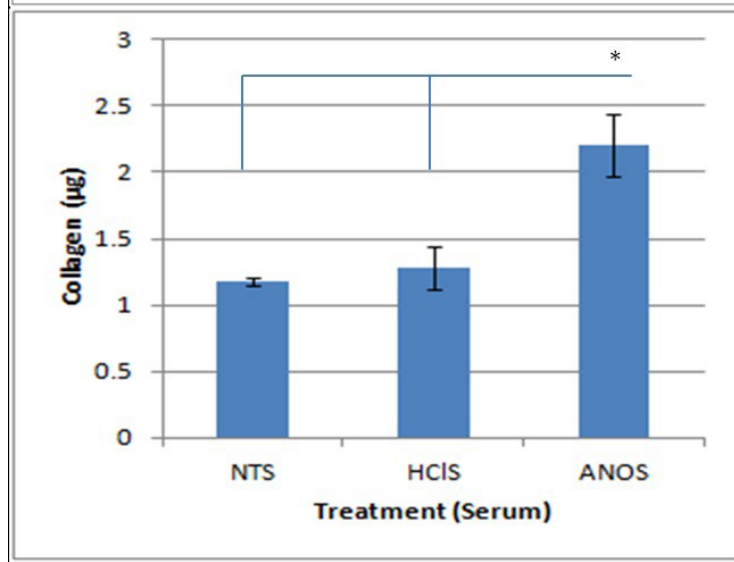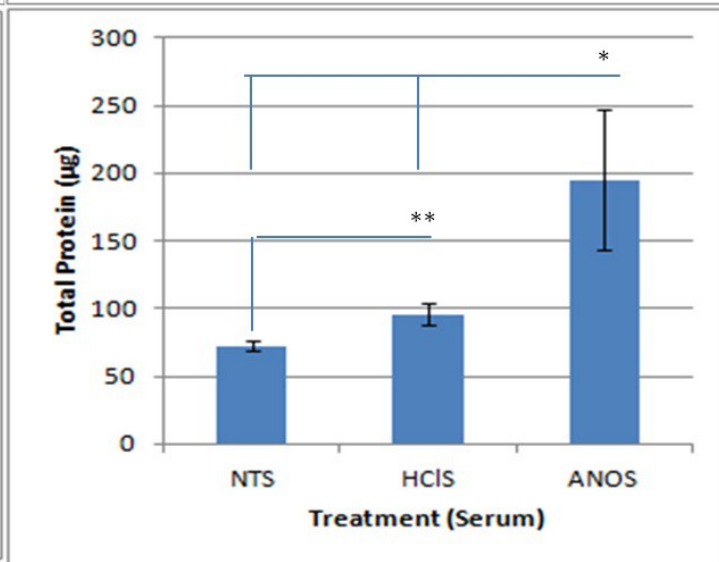

Supplement: c5nr01237f4.pdf [file c5nr01237f4.pdf]

## Water Contact Angles

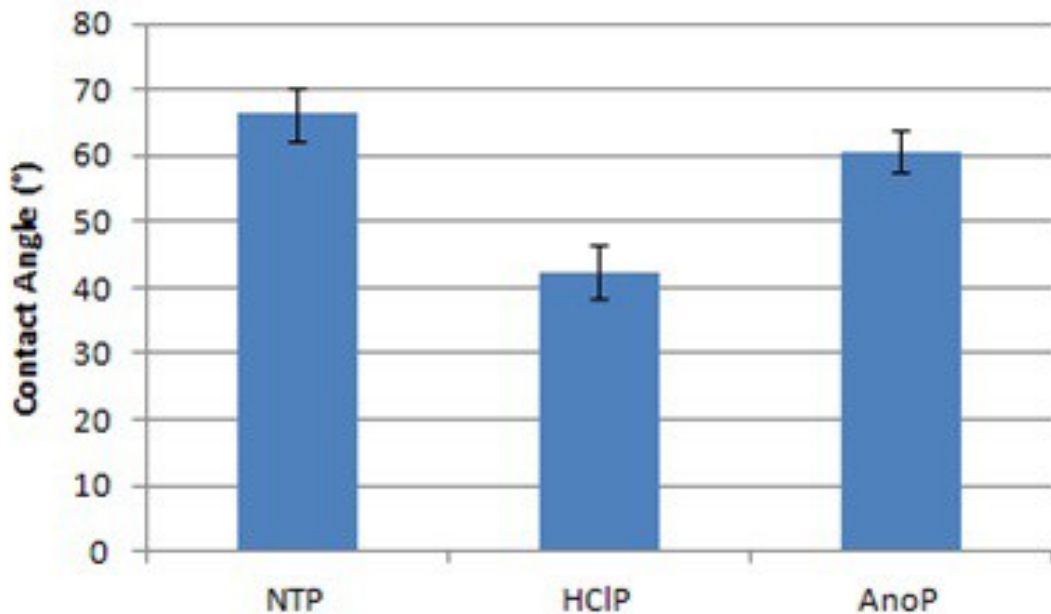

Supplement: c5nr01237f7.pdf [file c5nr01237f7.pdf]
